# Supplementary material
Source: publisher figshare collection journal article supplement (https://acs.figshare.com/ndownloader/files/31788572)
Supplement: Supplementary file 1 [file 31788572]

## Sheet: Sheet1
Ensembl Gene ID	Gene Symbol	log2FoldChange	p-value	Regulation
ENSG00000003989	SLC7A2	1.49174	0.00196159	up
ENSG00000008517	IL32	1.66776	0.00479114	up
ENSG00000026559	KCNG1	1.27922	5.31256e-05	up
ENSG00000041515	MYO16	1.22077	0.00135176	up
ENSG00000061656	SPAG4	1.0864	0.0348225	up
ENSG00000074370	ATP2A3	1.82986	0.00400787	up
ENSG00000078018	MAP2	1.27619	0.00444886	up
ENSG00000078081	LAMP3	2.26949	0.00032806	up
ENSG00000081181	ARG2	1.33507	0.00828036	up
ENSG00000088340	FER1L4	1.61377	0.037456	up
ENSG00000095303	PTGS1	2.45936	6.41039e-16	up
ENSG00000095752	IL11	2.01396	0.000899876	up
ENSG00000101255	TRIB3	1.01052	0.00287102	up
ENSG00000104856	RELB	1.09969	0.00121148	up
ENSG00000105514	RAB3D	1.47297	0.00107455	up
ENSG00000105696	TMEM59L	1.17934	0.000124182	up
ENSG00000108691	CCL2	1.78275	0.000101195	up
ENSG00000108700	CCL8	4.43882	0.0186147	up
ENSG00000109107	ALDOC	1.20595	0.00999711	up
ENSG00000109272	PF4V1	1.32098	0.00861954	up
ENSG00000109321	AREG	1.1679	0.00878811	up
ENSG00000110245	APOC3	2.14516	6.51898e-05	up
ENSG00000111913	FAM65B	1.60275	9.09483e-09	up
ENSG00000112936	C7	1.39061	0.00360658	up
ENSG00000115009	CCL20	1.56326	0.0063632	up
ENSG00000116991	SIPA1L2	1.11692	0.0446904	up
ENSG00000118432	CNR1	3.65926	1.52846e-11	up
ENSG00000118526	TCF21	1.01372	0.0344737	up
ENSG00000118898	PPL	1.04268	0.00112065	up
ENSG00000123500	COL10A1	3.61924	0.0395633	up
ENSG00000124191	TOX2	1.38067	1.32792e-05	up
ENSG00000124440	HIF3A	1.5465	0.00295516	up
ENSG00000124875	CXCL6	1.1267	0.0191696	up
ENSG00000124882	EREG	1.61175	0.00577055	up
ENSG00000130203	APOE	2.7785	1.38995e-13	up
ENSG00000130208	APOC1	1.83415	0.0153249	up
ENSG00000132639	SNAP25	1.03104	0.0426143	up
ENSG00000132821	VSTM2L	1.34378	3.55073e-05	up
ENSG00000134830	C5AR2	1.62463	6.06672e-07	up
ENSG00000136928	GABBR2	2.52384	9.58649e-09	up
ENSG00000145506	NKD2	1.02982	0.00285335	up
ENSG00000146555	SDK1	1.09509	0.0192668	up
ENSG00000148926	ADM	1.18995	5.93676e-05	up
ENSG00000152779	SLC16A12	1.59617	0.00188941	up
ENSG00000153132	CLGN	1.86672	0.00620361	up
ENSG00000154553	PDLIM3	1.66016	0.000269956	up
ENSG00000155307	SAMSN1	1.76532	0.000766555	up
ENSG00000156127	BATF	1.58919	0.0404429	up
ENSG00000157992	KRTCAP3	6.24555	0.00715252	up
ENSG00000158716	DUSP23	1.04825	9.68815e-05	up
ENSG00000162630	B3GALT2	1.01564	0.00125031	up
ENSG00000162706	CADM3	2.1773	1.37614e-21	up
ENSG00000162892	IL24	3.66451	2.30683e-07	up
ENSG00000162894	FAIM3	2.33844	0.00052409	up
ENSG00000163083	INHBB	1.00713	0.0462081	up
ENSG00000163347	CLDN1	1.43917	0.0249628	up
ENSG00000163735	CXCL5	1.40006	0.000679096	up
ENSG00000163739	CXCL1	1.04687	0.00253256	up
ENSG00000164929	BAALC	1.43725	0.000818563	up
ENSG00000165092	ALDH1A1	1.54206	0.0478793	up
ENSG00000166292	TMEM100	1.00218	0.0103079	up
ENSG00000166922	SCG5	1.92429	4.43302e-06	up
ENSG00000169429	IL8	1.48404	1.65844e-08	up
ENSG00000170442	KRT86	1.29687	0.00565968	up
ENSG00000170458	CD14	1.04489	0.00217387	up
ENSG00000172197	MBOAT1	1.69531	0.0258988	up
ENSG00000174502	SLC26A9	1.67876	0.0228441	up
ENSG00000175471	MCTP1	1.32957	0.000530844	up
ENSG00000175556	LONRF3	1.66198	0.0392051	up
ENSG00000178235	SLITRK1	1.06635	0.0277847	up
ENSG00000178776	C5orf46	1.39014	0.047455	up
ENSG00000179869	ABCA13	1.09446	0.017445	up
ENSG00000181036	FCRL6	1.39354	0.0270016	up
ENSG00000181374	CCL13	1.69968	0.000141841	up
ENSG00000181409	AATK	1.73692	0.0498954	up
ENSG00000183578	TNFAIP8L3	1.08323	0.000152355	up
ENSG00000184779	RPS17	4.71119	2.44579e-51	up
ENSG00000185100	ADSSL1	1.12083	0.0301354	up
ENSG00000185585	OLFML2A	1.17803	8.65878e-06	up
ENSG00000187908	DMBT1	2.85677	1.06378e-06	up
ENSG00000187957	DNER	1.58473	0.0346052	up
ENSG00000188375	H3F3C	1.34965	0.0349005	up
ENSG00000189058	APOD	1.1107	0.000385053	up
ENSG00000196616	ADH1B	2.12888	2.21605e-15	up
ENSG00000196878	LAMB3	1.07225	0.0274125	up
ENSG00000197405	C5AR1	2.39451	2.7031e-16	up
ENSG00000197410	DCHS2	1.36412	0.0293683	up
ENSG00000197872	FAM49A	1.38887	0.014129	up
ENSG00000198729	PPP1R14C	1.27099	0.00741029	up
ENSG00000204351	SKIV2L	5.9952	0.0297148	up
ENSG00000204525	HLA-C	1.16383	0.0150767	up
ENSG00000205595	AREGB	2.94417	0.00131418	up
ENSG00000205639	MFSD2B	1.47346	0.0074922	up
ENSG00000212493	SNORD19	5.71605	0.0307015	up
ENSG00000213088	DARC	2.33595	1.72948e-14	up
ENSG00000213942	RP1-102E24.1	1.72588	0.0088956	up
ENSG00000224712	NPIPA3	2.45588	0.041832	up
ENSG00000225177	RP11-390P2.4	1.04964	0.0385742	up
ENSG00000225670	CTA-134P22.2	1.92269	0.0391249	up
ENSG00000226329	AC005682.6	3.89549	0.0131923	up
ENSG00000227076	RP11-4C20.4	4.91927	0.0220455	up
ENSG00000228109	MFI2-AS1	1.67186	0.0242899	up
ENSG00000228560	RP11-550P17.5	1.44549	0.00162683	up
ENSG00000231196	RP11-495P10.8	1.09338	0.0420742	up
ENSG00000232561	GTF2IP1	1.0645	0.0207181	up
ENSG00000233532	LINC00460	4.62879	0.00436424	up
ENSG00000234807	LINC01135	4.73454	0.0334294	up
ENSG00000239332	LINC01119	1.6603	0.000259184	up
ENSG00000247095	MIR210HG	1.54434	0.0467901	up
ENSG00000250049	RP11-348J24.2	2.497	0.015146	up
ENSG00000256001	RP11-575F12.2	2.04096	9.37847e-05	up
ENSG00000260581	CTB-113P19.4	5.69574	0.0298387	up
ENSG00000262801	U91319.1	5.81823	0.0254607	up
ENSG00000267913	AP001055.1	5.69548	0.0351804	up
ENSG00000273001	RP11-118K6.3	5.77894	0.025095	up
ENSG00000003137	CYP26B1	-1.02298	0.0285206	down
ENSG00000004139	SARM1	-1.27534	0.0238827	down
ENSG00000005513	SOX8	-3.84581	0.0131657	down
ENSG00000006377	DLX6	-1.26817	0.00238021	down
ENSG00000008277	ADAM22	-1.59752	0.0293138	down
ENSG00000015413	DPEP1	-1.27705	0.00128075	down
ENSG00000017427	IGF1	-2.8718	4.68963e-19	down
ENSG00000019991	HGF	-1.05743	0.0222847	down
ENSG00000021645	NRXN3	-2.33369	0.016918	down
ENSG00000027644	INSRR	-3.39135	0.0404406	down
ENSG00000031003	FAM13B	-1.06569	0.000466391	down
ENSG00000041982	TNC	-1.34488	9.17139e-06	down
ENSG00000042980	ADAM28	-2.01847	0.00537172	down
ENSG00000049540	ELN	-2.8593	0.000314262	down
ENSG00000058866	DGKG	-1.29668	0.0157454	down
ENSG00000061455	PRDM6	-1.66495	0.00261823	down
ENSG00000064886	CHI3L2	-1.04605	0.00178738	down
ENSG00000076554	TPD52	-2.33579	3.79328e-05	down
ENSG00000078401	EDN1	-1.56678	0.000530696	down
ENSG00000082497	SERTAD4	-1.68612	0.0380122	down
ENSG00000091128	LAMB4	-5.44381	0.0483553	down
ENSG00000102466	FGF14	-1.12419	0.00169459	down
ENSG00000103723	AP3B2	-1.38709	0.0269608	down
ENSG00000104044	OCA2	-1.71068	0.0118853	down
ENSG00000105605	CACNG7	-1.39188	0.0322654	down
ENSG00000105880	DLX5	-1.21499	2.83329e-05	down
ENSG00000105894	PTN	-2.28059	1.97645e-05	down
ENSG00000106483	SFRP4	-1.82612	2.27168e-08	down
ENSG00000106484	MEST	-1.48701	3.49711e-07	down
ENSG00000107105	ELAVL2	-5.46295	0.0432025	down
ENSG00000107562	CXCL12	-1.48267	9.91565e-07	down
ENSG00000108823	SGCA	-3.68383	0.0386637	down
ENSG00000109072	VTN	-3.52534	0.000523214	down
ENSG00000109705	NKX3-2	-1.2577	0.0145273	down
ENSG00000109743	BST1	-1.21064	0.00736479	down
ENSG00000109758	HGFAC	-6.06342	0.0109656	down
ENSG00000111341	MGP	-3.15569	3.21757e-13	down
ENSG00000112139	MDGA1	-1.67208	0.000241991	down
ENSG00000112394	SLC16A10	-2.12819	0.0444997	down
ENSG00000112761	WISP3	-1.17681	0.00883793	down
ENSG00000112852	PCDHB2	-1.08052	0.0282578	down
ENSG00000113594	LIFR	-1.30152	1.46926e-08	down
ENSG00000114790	ARHGEF26	-1.10909	0.0428561	down
ENSG00000115461	IGFBP5	-1.89322	4.99927e-10	down
ENSG00000115738	ID2	-1.00341	0.00210658	down
ENSG00000115956	PLEK	-2.77778	0.03997	down
ENSG00000116194	ANGPTL1	-1.78058	6.14787e-09	down
ENSG00000116690	PRG4	-1.61976	0.0029557	down
ENSG00000117594	HSD11B1	-1.12292	0.00870175	down
ENSG00000118515	SGK1	-1.27613	0.000294566	down
ENSG00000120327	PCDHB14	-1.09121	0.00679893	down
ENSG00000120645	IQSEC3	-1.26798	0.0065956	down
ENSG00000123095	BHLHE41	-1.34965	0.00106771	down
ENSG00000123243	ITIH5	-1.91396	0.0361296	down
ENSG00000124107	SLPI	-1.82568	9.46395e-06	down
ENSG00000125848	FLRT3	-1.1906	0.0170337	down
ENSG00000125966	MMP24	-1.12252	0.0213763	down
ENSG00000126016	AMOT	-1.3901	0.000209047	down
ENSG00000126785	RHOJ	-2.25807	0.000504108	down
ENSG00000126860	EVI2A	-1.22513	0.0269857	down
ENSG00000127083	OMD	-1.17505	0.00417334	down
ENSG00000128011	LRFN1	-1.30608	0.0390253	down
ENSG00000128567	PODXL	-1.24865	0.012418	down
ENSG00000128606	LRRC17	-1.29451	0.0236385	down
ENSG00000128655	PDE11A	-1.38049	0.0222793	down
ENSG00000130201	EXOC3L2	-5.4533	0.0437505	down
ENSG00000130558	OLFM1	-3.24001	0.0101806	down
ENSG00000130600	H19	-1.43671	0.000218443	down
ENSG00000131389	SLC6A6	-1.15684	0.00180827	down
ENSG00000133107	TRPC4	-1.07525	0.00753485	down
ENSG00000134207	SYT6	-1.53718	0.00531377	down
ENSG00000134343	ANO3	-1.07379	0.00487576	down
ENSG00000134539	KLRD1	-2.07121	0.0442979	down
ENSG00000135324	MRAP2	-1.54473	0.00972266	down
ENSG00000135502	SLC26A10	-2.21371	0.0107047	down
ENSG00000135549	PKIB	-1.86385	0.0334347	down
ENSG00000137203	TFAP2A	-1.63902	0.0327341	down
ENSG00000137558	PI15	-3.75115	2.12283e-16	down
ENSG00000137834	SMAD6	-1.02189	0.0144596	down
ENSG00000137872	SEMA6D	-2.51416	1.50345e-08	down
ENSG00000138650	PCDH10	-1.07504	0.0111009	down
ENSG00000138735	PDE5A	-1.05185	0.00049546	down
ENSG00000140022	STON2	-1.38814	0.0346969	down
ENSG00000140057	AK7	-3.4466	0.0313664	down
ENSG00000140993	TIGD7	-1.79952	0.0403442	down
ENSG00000141448	GATA6	-1.33747	0.000189404	down
ENSG00000141837	CACNA1A	-1.1963	0.0110408	down
ENSG00000143140	GJA5	-1.15106	0.0010553	down
ENSG00000143494	VASH2	-1.94839	0.0112884	down
ENSG00000143512	HHIPL2	-1.63907	0.00738933	down
ENSG00000143631	FLG	-1.9705	3.92969e-06	down
ENSG00000143850	PLEKHA6	-1.19013	0.0196571	down
ENSG00000144063	MALL	-1.71249	0.0347632	down
ENSG00000144668	ITGA9	-1.40146	0.0412378	down
ENSG00000144837	PLA1A	-6.91365	0.000562817	down
ENSG00000145358	DDIT4L	-1.92882	4.15418e-07	down
ENSG00000145721	LIX1	-5.43184	0.0454484	down
ENSG00000146250	PRSS35	-2.74034	0.0162252	down
ENSG00000147036	LANCL3	-1.22722	0.0332039	down
ENSG00000147655	RSPO2	-2.6481	9.4727e-05	down
ENSG00000147799	ARHGAP39	-1.05803	0.0394442	down
ENSG00000148488	ST8SIA6	-3.02316	0.0269406	down
ENSG00000149596	JPH2	-1.16018	0.000588766	down
ENSG00000150594	ADRA2A	-1.67817	9.30173e-05	down
ENSG00000150681	RGS18	-1.0011	0.0170204	down
ENSG00000151136	BTBD11	-1.01256	0.0095115	down
ENSG00000152580	IGSF10	-1.20959	0.000660978	down
ENSG00000154864	PIEZO2	-2.1728	8.26322e-06	down
ENSG00000154928	EPHB1	-1.1156	0.0110593	down
ENSG00000155530	LRGUK	-5.99374	0.0156775	down
ENSG00000155792	DEPTOR	-1.2828	4.28549e-06	down
ENSG00000157766	ACAN	-1.1282	0.000209275	down
ENSG00000158050	DUSP2	-1.30813	0.0162976	down
ENSG00000158856	DMTN	-2.59148	0.00614143	down
ENSG00000159251	ACTC1	-1.41828	0.00258602	down
ENSG00000159307	SCUBE1	-1.59461	0.00282673	down
ENSG00000159674	SPON2	-1.15714	1.76889e-05	down
ENSG00000160588	MPZL3	-2.64646	0.0019293	down
ENSG00000162383	SLC1A7	-5.80715	0.0208952	down
ENSG00000162591	MEGF6	-1.23972	0.000130922	down
ENSG00000162595	DIRAS3	-1.0207	0.00914693	down
ENSG00000163251	FZD5	-1.3029	0.00303945	down
ENSG00000163376	KBTBD8	-1.08695	0.0449692	down
ENSG00000163395	IGFN1	-6.14623	0.0136037	down
ENSG00000164418	GRIK2	-1.07502	0.0476349	down
ENSG00000164484	TMEM200A	-1.10712	1.42926e-05	down
ENSG00000165194	PCDH19	-1.43772	0.0443855	down
ENSG00000165197	FIGF	-5.60218	0.0324817	down
ENSG00000165409	TSHR	-1.72017	0.00554341	down
ENSG00000165495	PKNOX2	-2.13081	0.000777692	down
ENSG00000165694	FRMD7	-2.66928	0.0119338	down
ENSG00000167191	GPRC5B	-2.33401	0.0194359	down
ENSG00000167554	ZNF610	-1.00298	0.0423759	down
ENSG00000168675	LDLRAD4	-1.10261	0.0132109	down
ENSG00000168685	IL7R	-1.51171	2.16398e-07	down
ENSG00000168913	ENHO	-2.38777	0.0471865	down
ENSG00000168952	STXBP6	-1.076	0.017401	down
ENSG00000169116	PARM1	-1.21493	0.0310036	down
ENSG00000169184	MN1	-1.29147	0.000142299	down
ENSG00000169231	THBS3	-1.00906	0.015215	down
ENSG00000170412	GPRC5C	-1.04605	0.0314042	down
ENSG00000171345	KRT19	-1.67058	0.0184308	down
ENSG00000171385	KCND3	-1.83568	0.00981127	down
ENSG00000172201	ID4	-1.08605	0.00879853	down
ENSG00000172346	CSDC2	-3.22266	0.041233	down
ENSG00000172403	SYNPO2	-1.0472	0.00107731	down
ENSG00000172748	ZNF596	-1.27958	0.00991096	down
ENSG00000173175	ADCY5	-2.43083	0.0237738	down
ENSG00000174348	PODN	-1.25562	0.0010031	down
ENSG00000174428	GTF2IRD2B	-1.20771	0.00492913	down
ENSG00000174469	CNTNAP2	-1.93357	3.77427e-05	down
ENSG00000175048	ZDHHC14	-1.62018	0.0101171	down
ENSG00000175356	SCUBE2	-1.47165	0.00624478	down
ENSG00000176928	GCNT4	-1.5811	0.0175278	down
ENSG00000178573	MAF	-1.5884	3.29445e-05	down
ENSG00000178695	KCTD12	-1.09475	0.00109209	down
ENSG00000180573	HIST1H2AC	-1.02685	0.00973907	down
ENSG00000180694	TMEM64	-1.07489	0.00242411	down
ENSG00000181143	MUC16	-5.7414	0.0313762	down
ENSG00000182010	RTKN2	-1.47646	0.043747	down
ENSG00000182272	B4GALNT4	-1.41161	0.043083	down
ENSG00000182580	EPHB3	-1.02234	0.0186016	down
ENSG00000183508	FAM46C	-2.20229	0.016688	down
ENSG00000183715	OPCML	-4.52631	0.00965715	down
ENSG00000183801	OLFML1	-1.73031	0.0493647	down
ENSG00000184307	ZDHHC23	-1.03878	0.0452457	down
ENSG00000184678	HIST2H2BE	-1.03008	0.0263939	down
ENSG00000185052	SLC24A3	-2.54968	0.000185569	down
ENSG00000185269	NOTUM	-1.33432	0.0485484	down
ENSG00000186407	CD300E	-4.59514	0.00822226	down
ENSG00000186517	ARHGAP30	-5.41989	0.0492265	down
ENSG00000187068	C3orf70	-2.02699	0.00112827	down
ENSG00000187372	PCDHB13	-1.12462	0.0280813	down
ENSG00000187634	SAMD11	-1.22761	0.00340244	down
ENSG00000187955	COL14A1	-1.10242	0.00871439	down
ENSG00000188199	NUTM2B	-5.71873	0.0315117	down
ENSG00000188368	PRR19	-6.2916	0.00501389	down
ENSG00000188517	COL25A1	-1.43333	0.0272553	down
ENSG00000188529	SRSF10	-1.94681	0.0184337	down
ENSG00000196296	ATP2A1	-1.17749	0.0430614	down
ENSG00000196358	NTNG2	-1.06498	0.0233159	down
ENSG00000196562	SULF2	-1.52299	2.72034e-10	down
ENSG00000197614	MFAP5	-1.21654	0.000112688	down
ENSG00000198133	TMEM229B	-1.45331	0.00475507	down
ENSG00000198929	NOS1AP	-2.17807	0.0470608	down
ENSG00000198938	MT-CO3	-1.10818	0.00339104	down
ENSG00000203872	C6orf163	-3.57449	0.0252717	down
ENSG00000205572	SERF1B	-2.13823	0.00094617	down
ENSG00000211448	DIO2	-1.79892	2.66922e-05	down
ENSG00000213160	KLHL23	-1.01571	0.0255614	down
ENSG00000213782	DDX47	-5.64013	0.0291161	down
ENSG00000214100	AC079776.2	-1.36692	0.0499629	down
ENSG00000215218	UBE2QL1	-4.09351	0.0320183	down
ENSG00000221852	KRTAP1-5	-1.02245	0.000595735	down
ENSG00000221890	NPTXR	-1.42525	2.35172e-07	down
ENSG00000223764	RP11-54O7.3	-1.17563	0.0230977	down
ENSG00000227082	AL592494.5	-5.47269	0.00360515	down
ENSG00000228444	RP11-173B14.4	-5.83109	0.0186535	down
ENSG00000228594	C1orf233	-1.17763	0.0152681	down
ENSG00000235428	WI2-2998D17.2	-6.51364	0.0128739	down
ENSG00000235649	MXRA5P1	-1.4249	0.0485721	down
ENSG00000235750	KIAA0040	-1.20183	0.000159813	down
ENSG00000250305	KIAA1456	-1.25301	0.00202006	down
ENSG00000254343	RP11-760H22.2	-1.7479	0.00249391	down
ENSG00000257176	RP11-996F15.2	-5.60218	0.0324817	down
ENSG00000257354	RP11-631N16.2	-1.91514	0.0242532	down
ENSG00000258488	RP11-467L19.8	-4.13128	0.0460661	down
ENSG00000259172	RP11-299G20.2	-5.78307	0.0248207	down
ENSG00000259498	RP11-244F12.3	-1.06463	0.0403753	down
ENSG00000260822	GS1-358P8.4	-1.15507	0.020012	down
ENSG00000261061	RP11-303E16.2	-1.18662	0.00867262	down
ENSG00000261222	CTD-2006K23.1	-5.83109	0.0186535	down
ENSG00000261468	RP11-1024P17.1	-1.64478	0.0084939	down
ENSG00000264176	MAGOH2	-3.87662	0.0111149	down
ENSG00000267010	RP11-108P20.1	-1.56668	0.0147943	down
ENSG00000267257	RP11-1151B14.4	-5.41006	0.0475197	down
ENSG00000271769	RP11-216P16.2	-4.15246	0.0276666	down
ENSG00000273045	C2ORF15	-5.71315	0.0252481	down
